# Supplementary material for: Orai3 Regulates Pancreatic Cancer Metastasis by Encoding a Functional Store Operated Calcium Entry Channel
Source: MDPI journal article supplement (doi:10.3390/cancers13235937), 2021-11-25

### Figure 1D. Orai3 expression in pancreatic cells

## 10% SDS gel

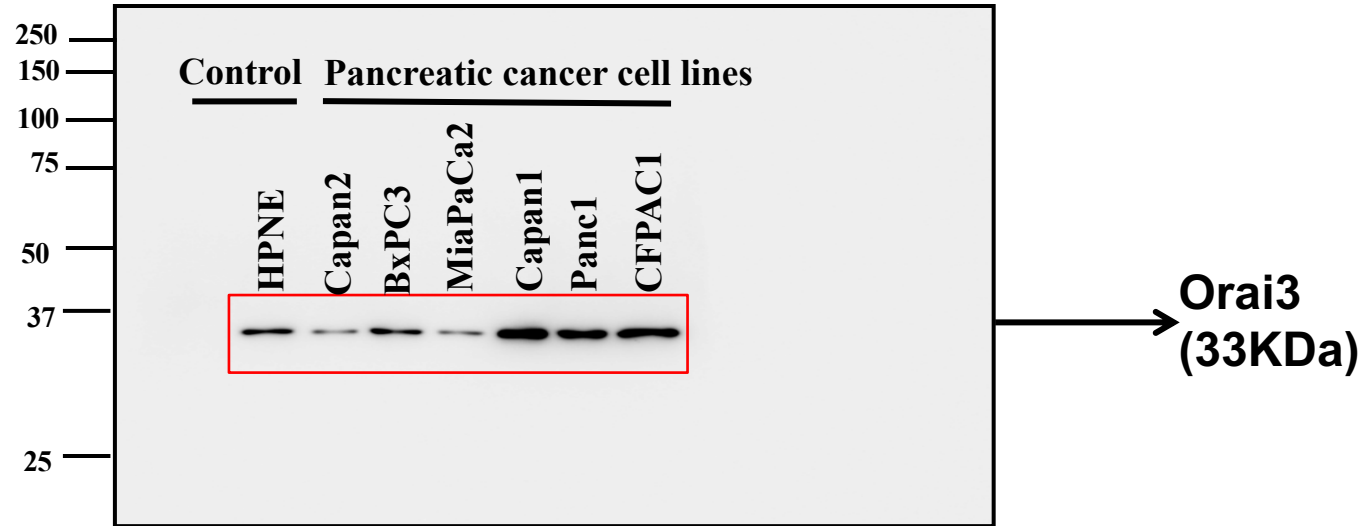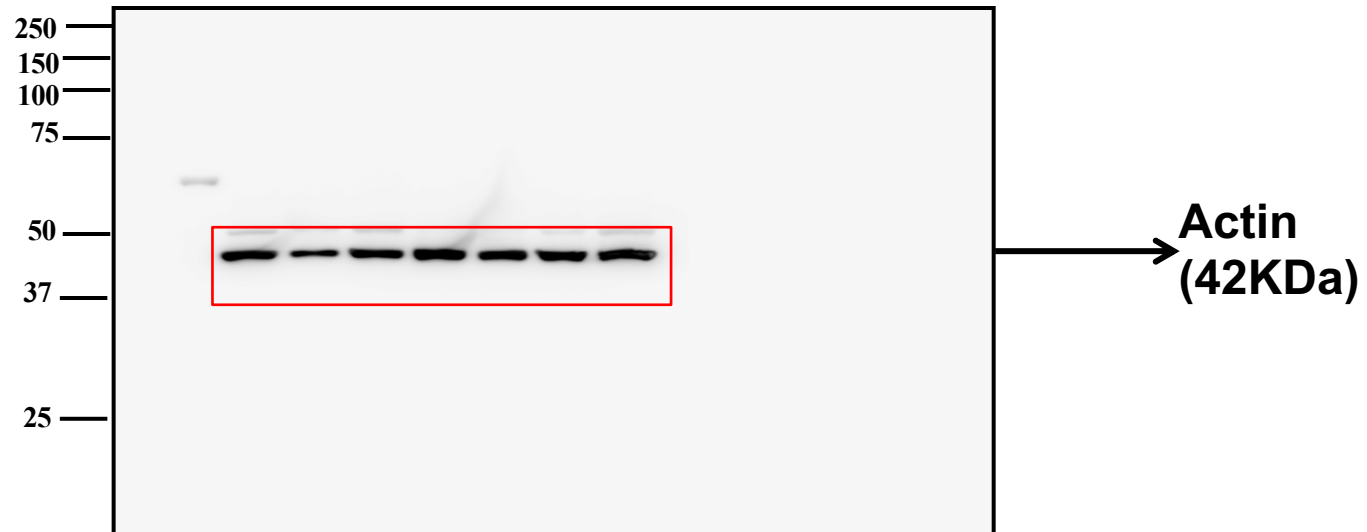

Figure 3C. Panc1 Orai3 knockdown full blots

10% SDS gel

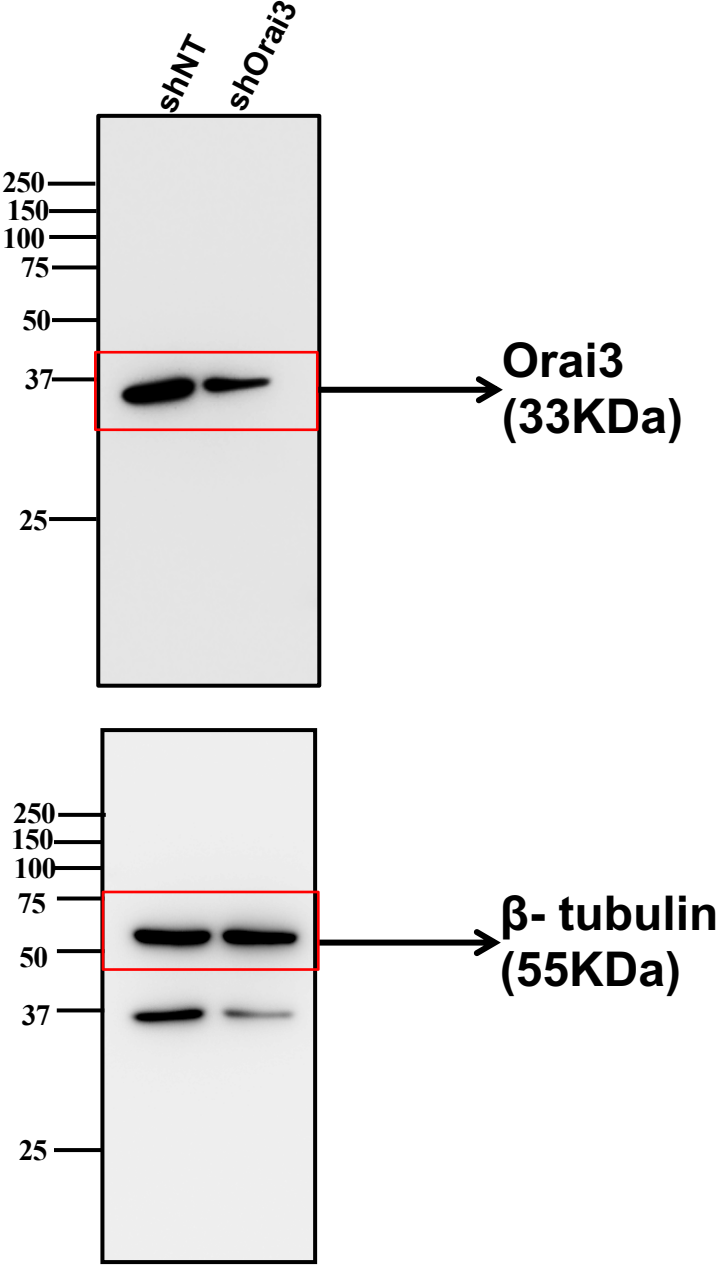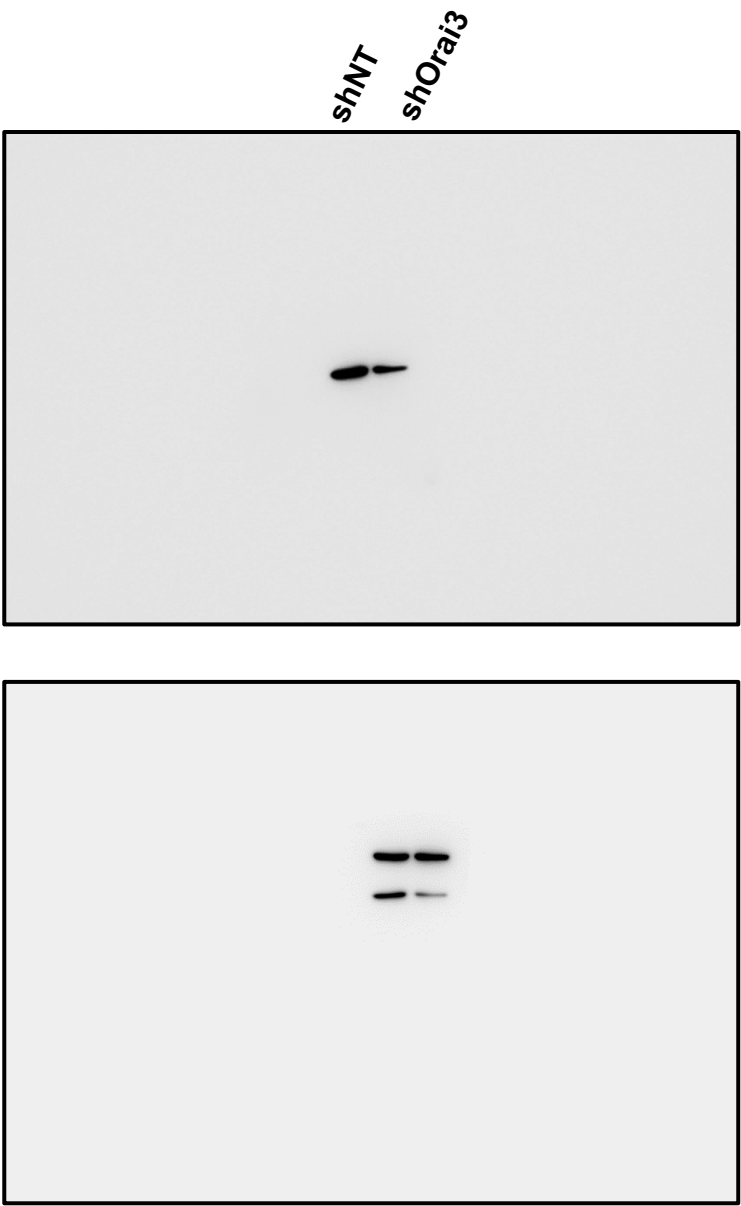

Figure 4D. HPNE Orai3 knockdown full blots

10% SDS gel

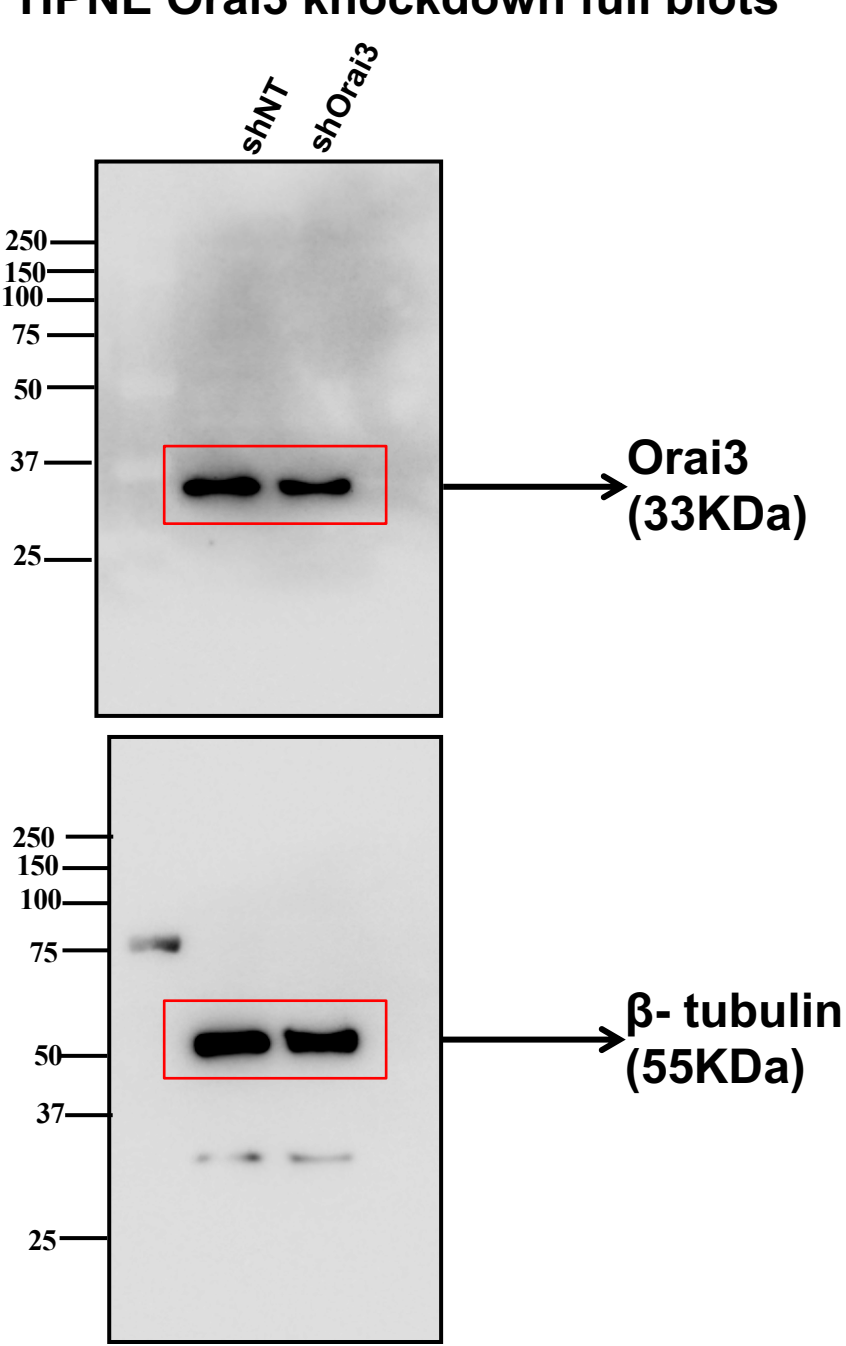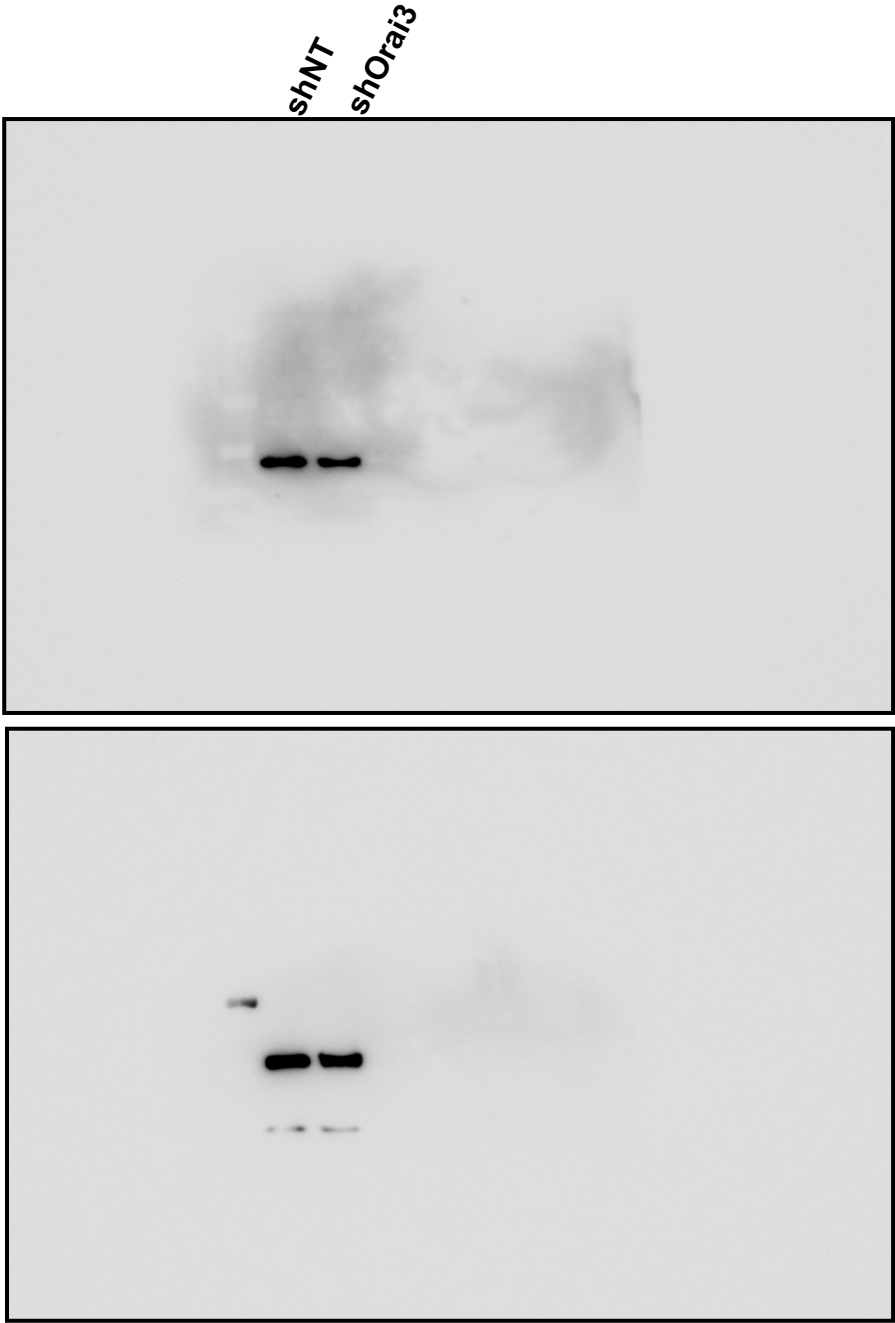

**Figure 5D. Cyclin D1**

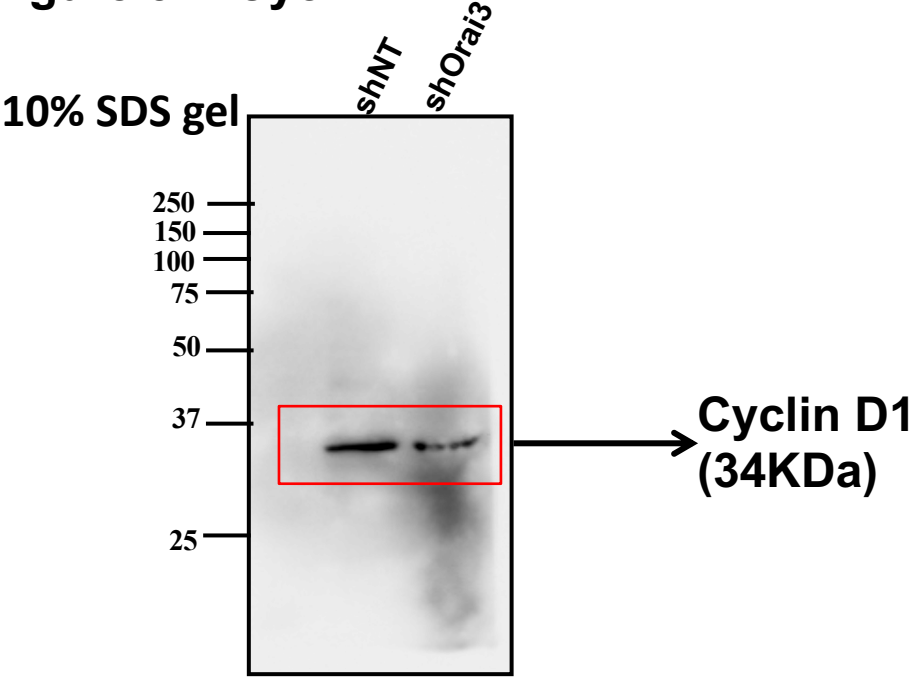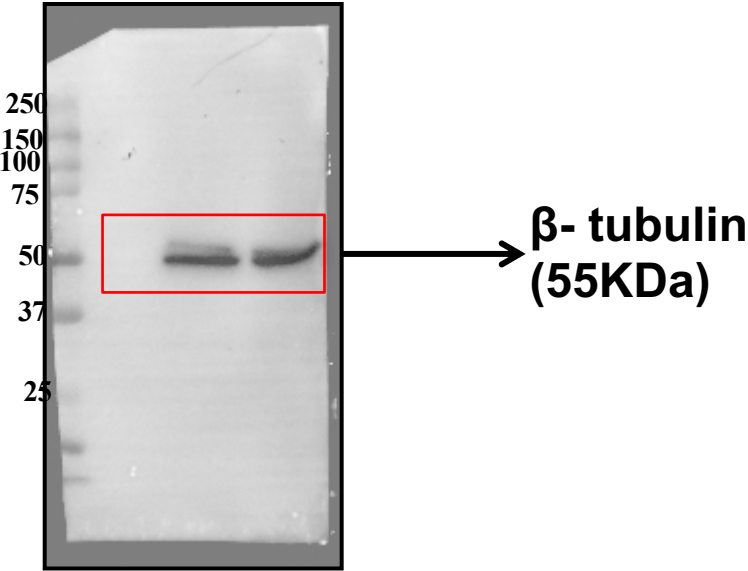

**Figure 5F. Cdk4**

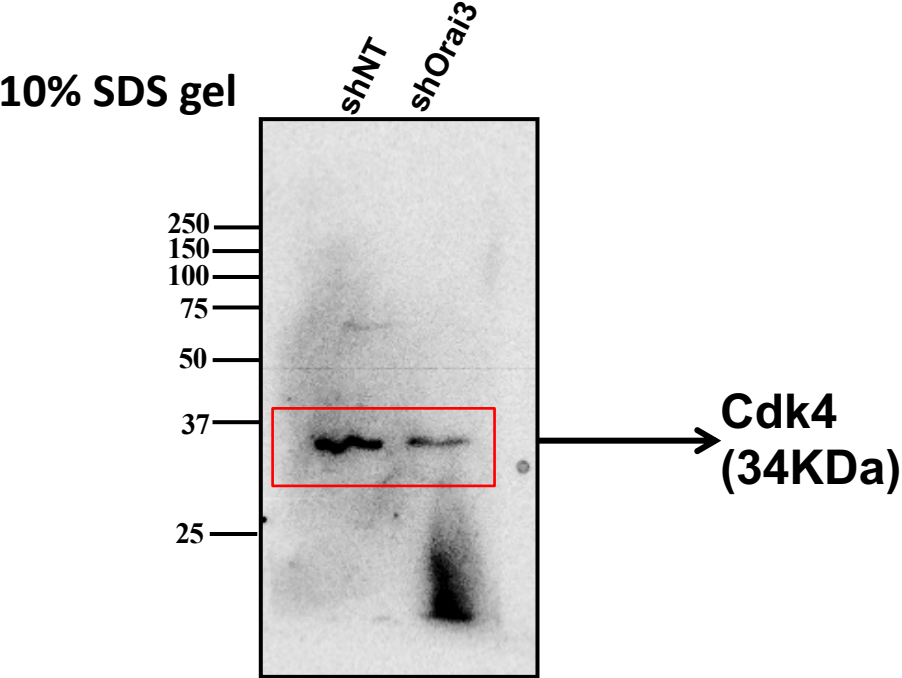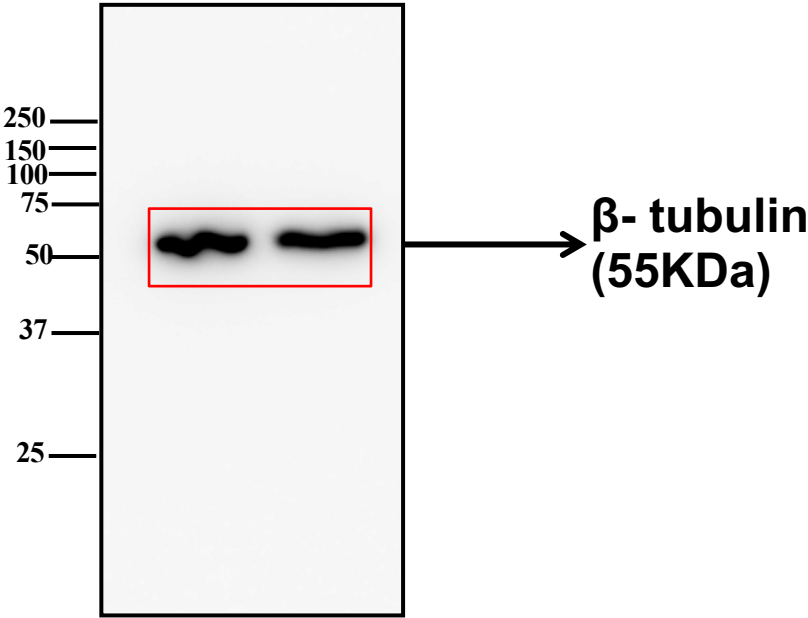



Figure 8D. Orai3 knockdown in tumor samples

12% SDS gel

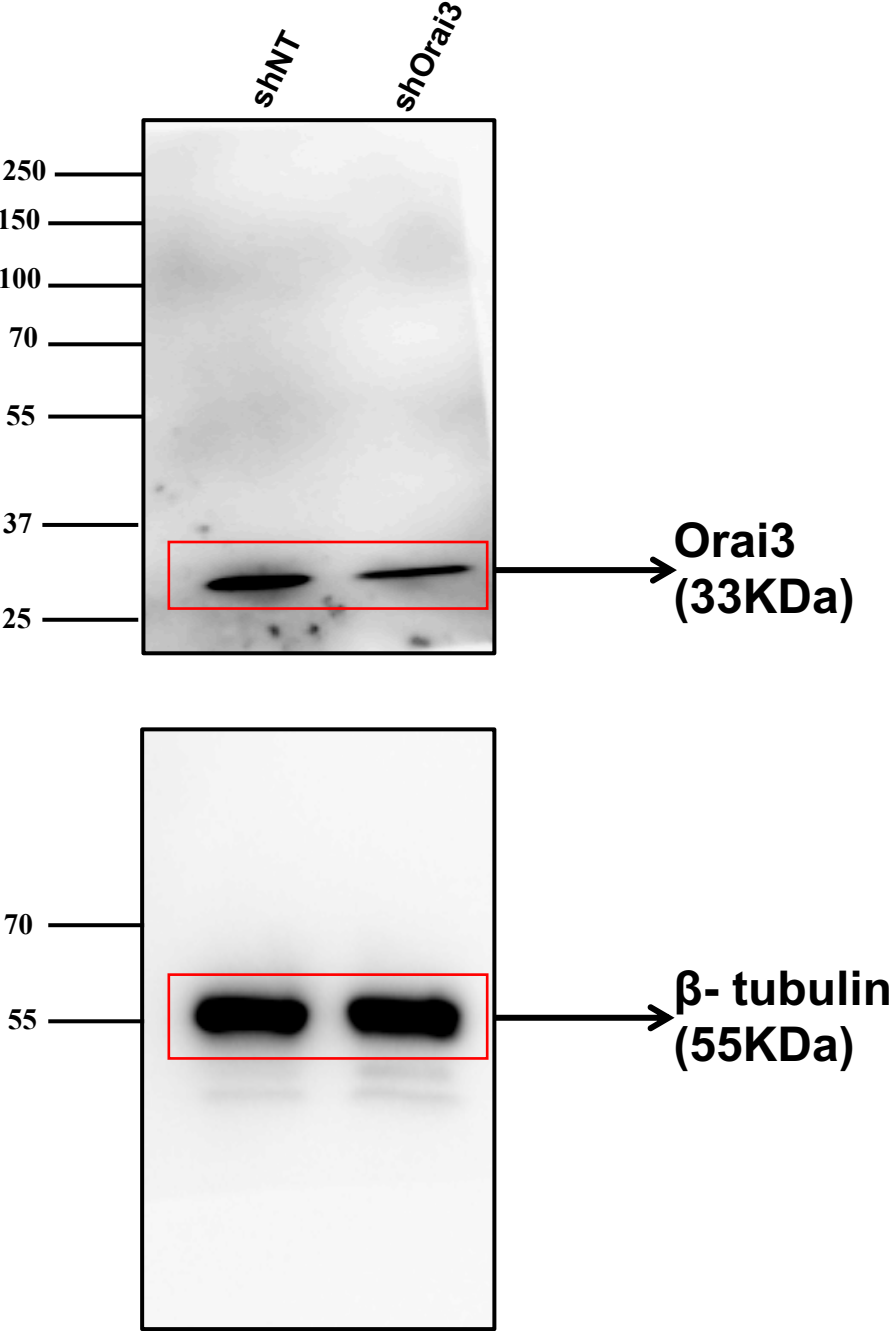

**Figure 8F. Cyclin D1 in tumor samples**

**12% SDS gel**

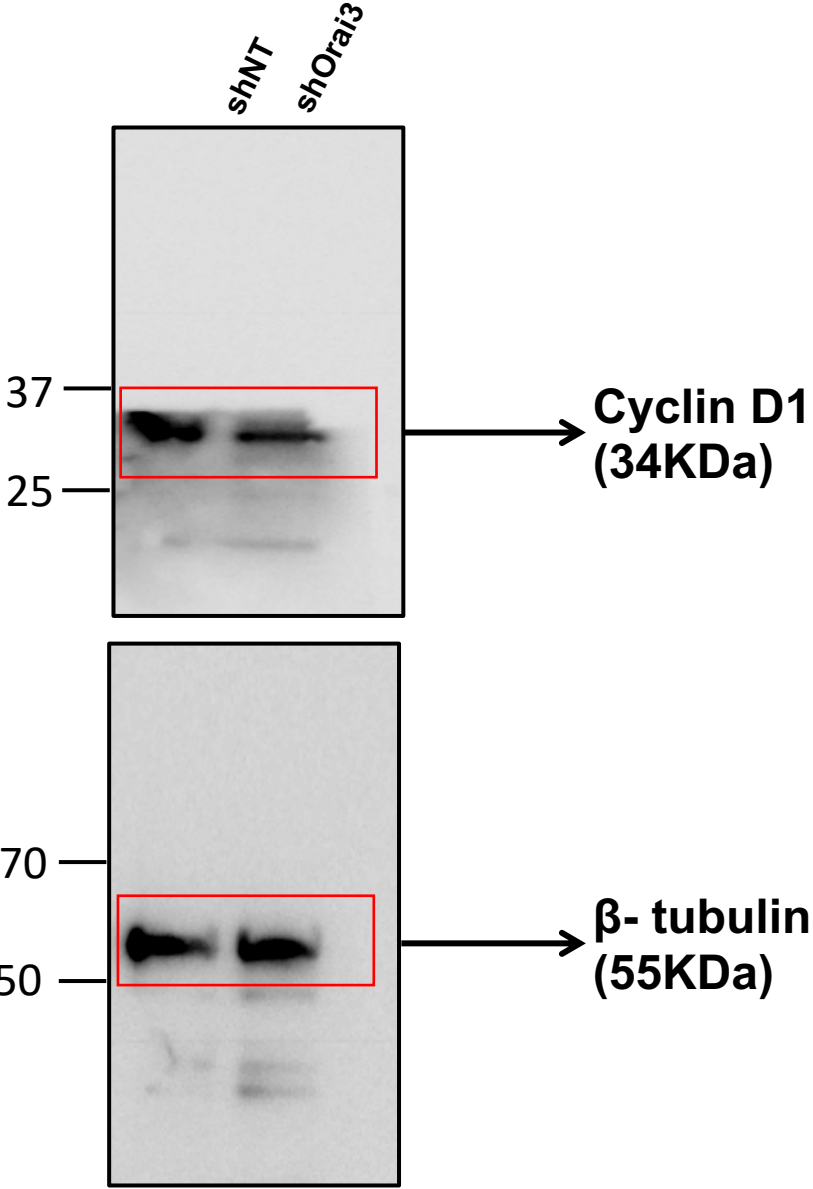

Figure 8H. Cdk4 in tumor samples

12% SDS gel

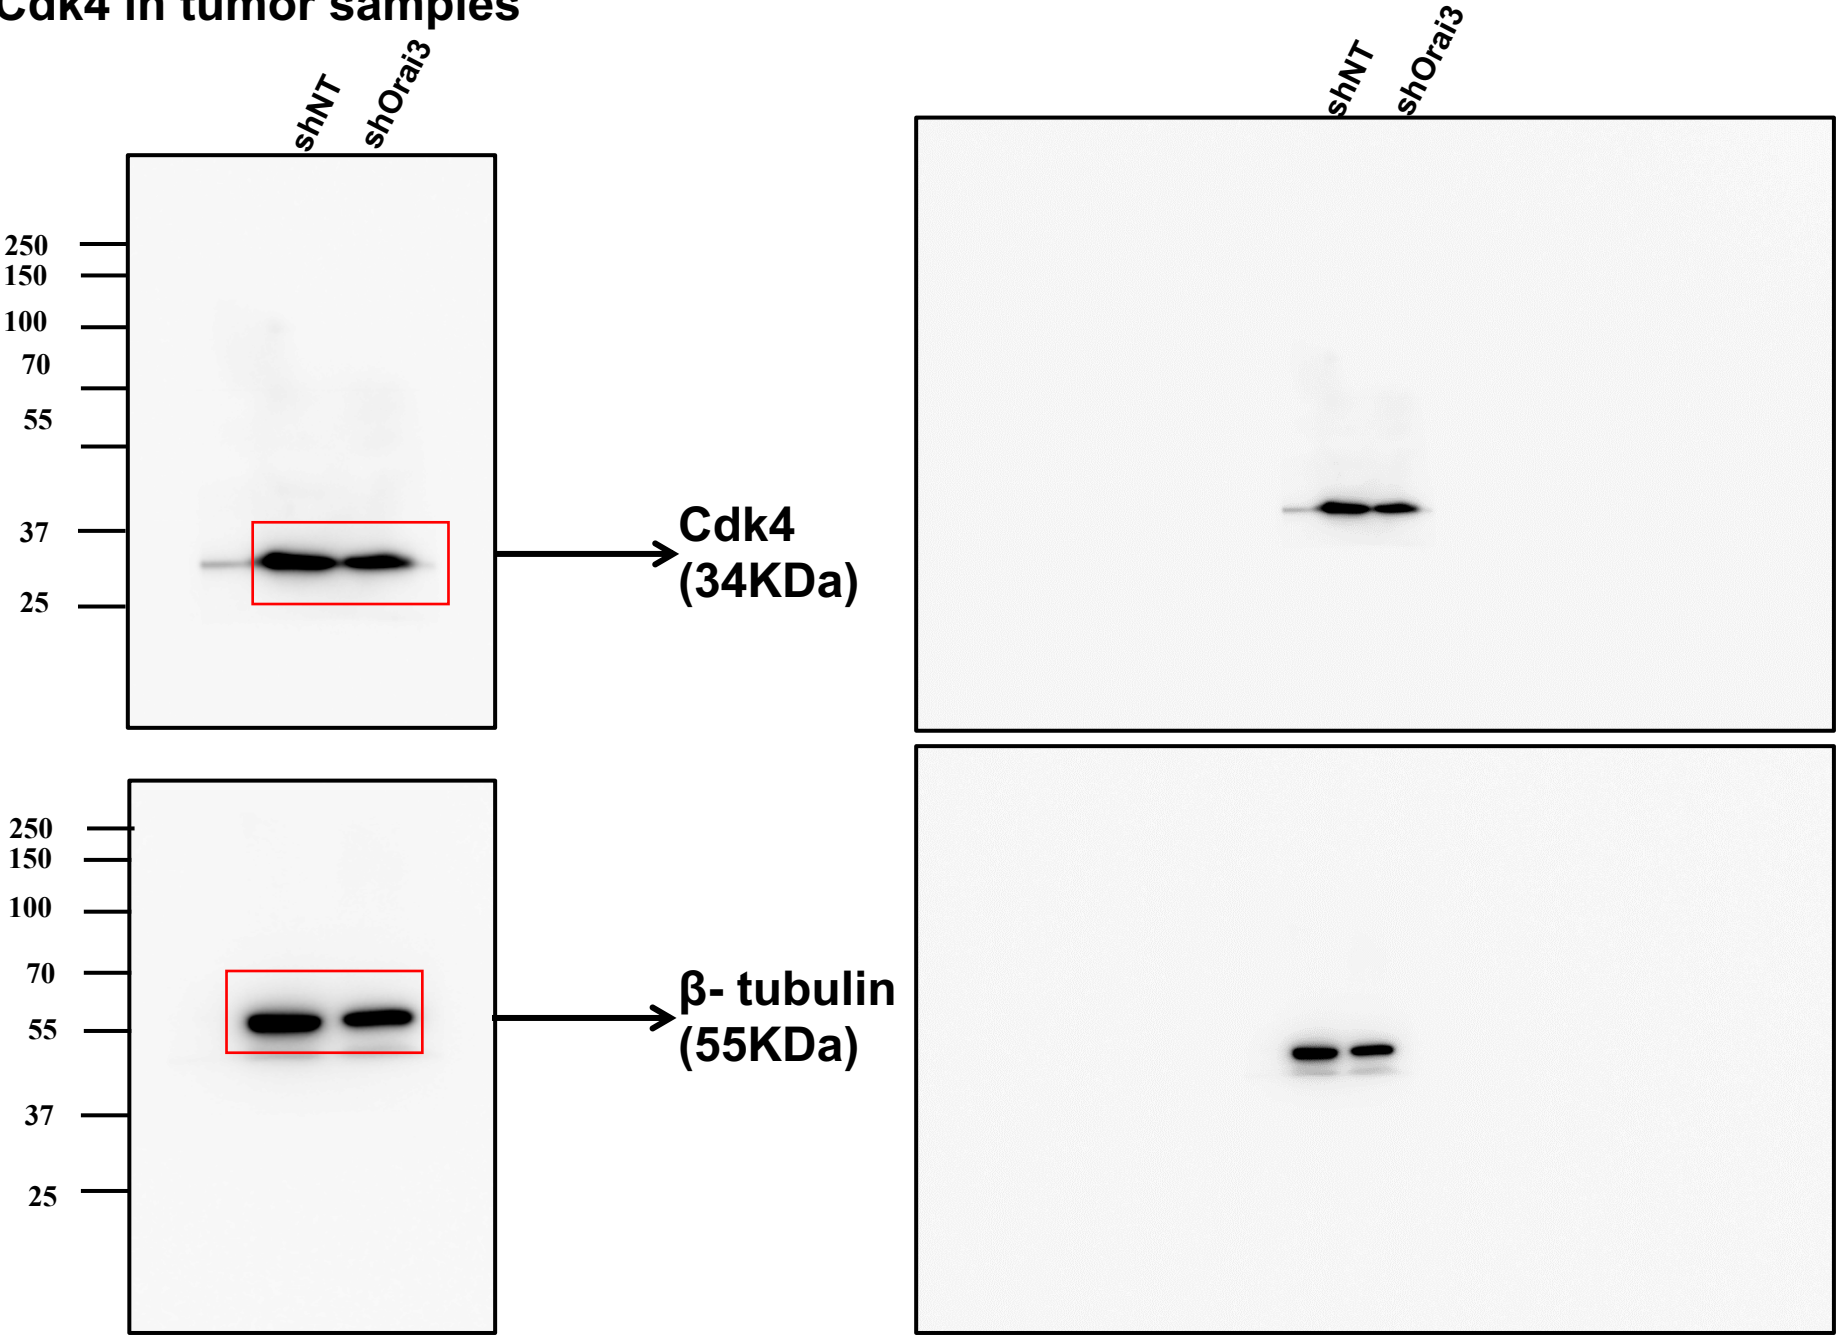

**Figure 9C. MMP2 in tumor samples**

**12% SDS gel**

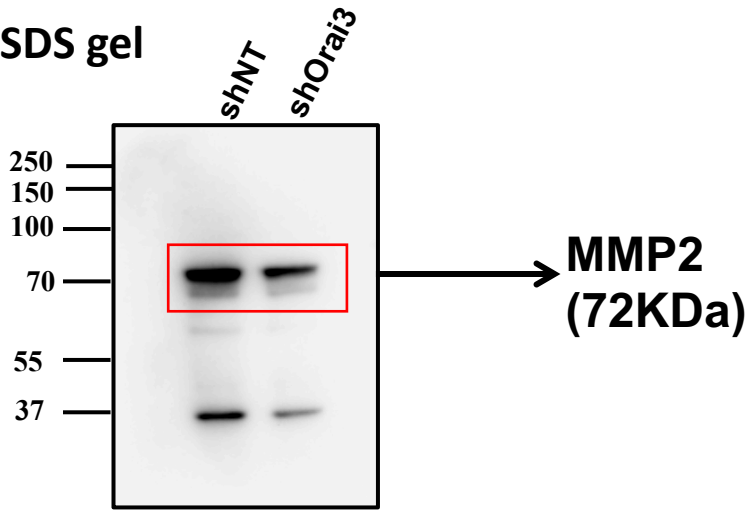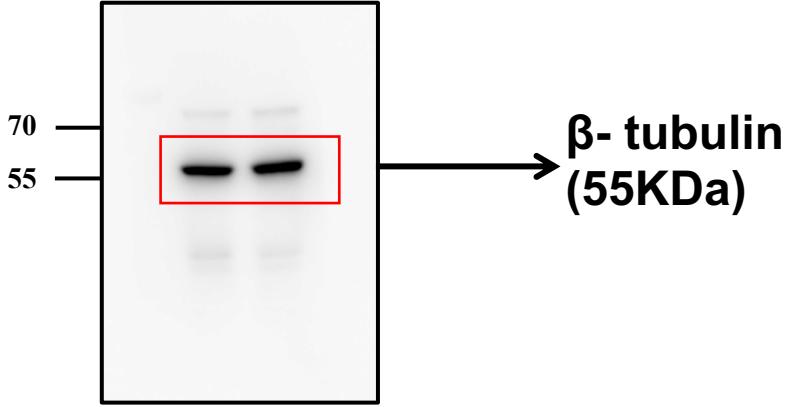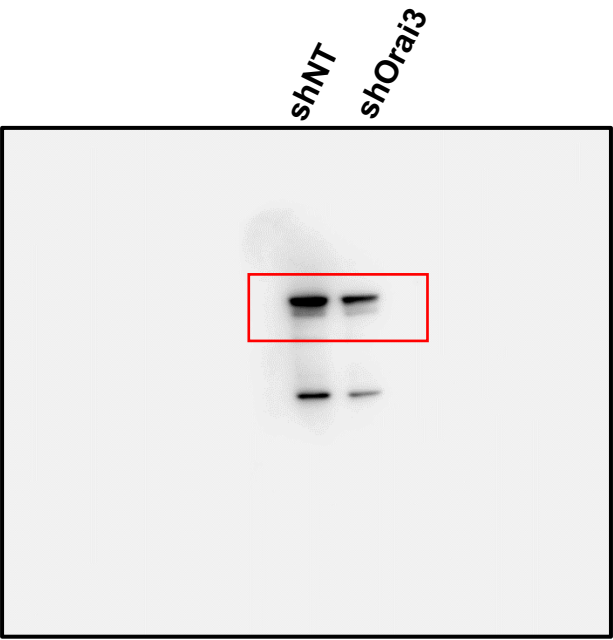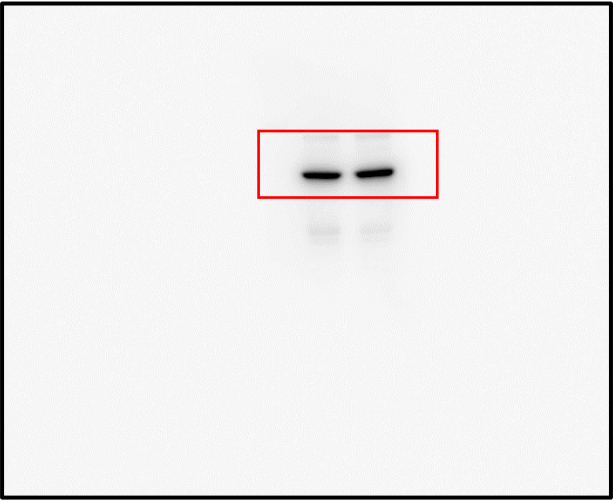

Figure 9E. E-cadherin in tumor samples

8% SDS gel

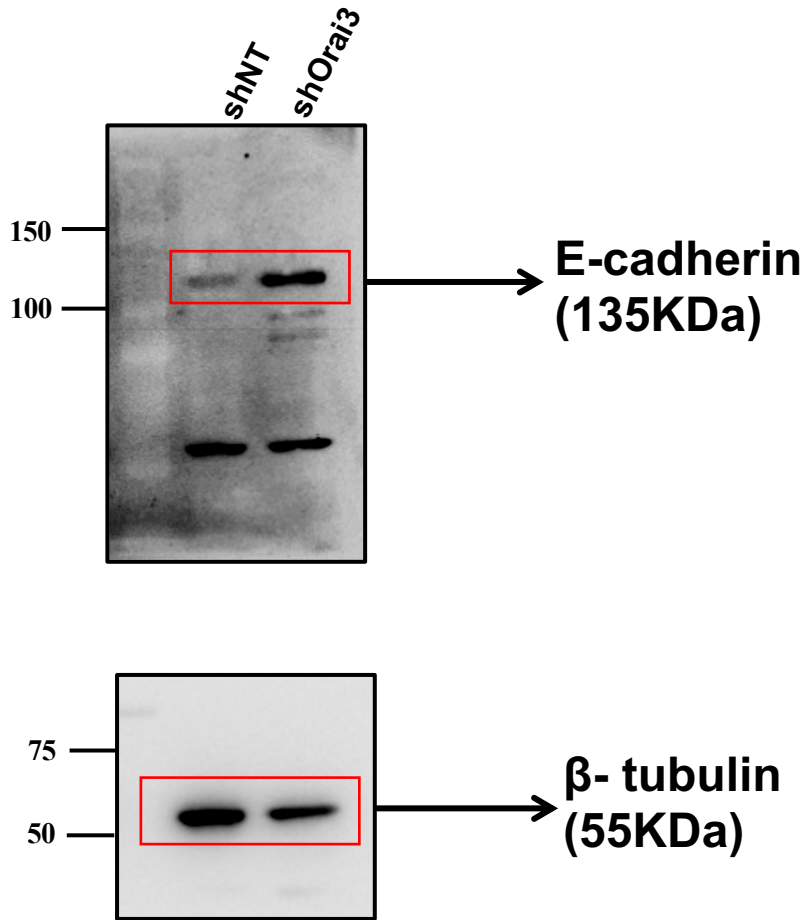

Supplementary Figure 1B and 1C. shOrai3 specifically targets Orai3 without changing Orai1 and Orai2 levels

12% SDS gel

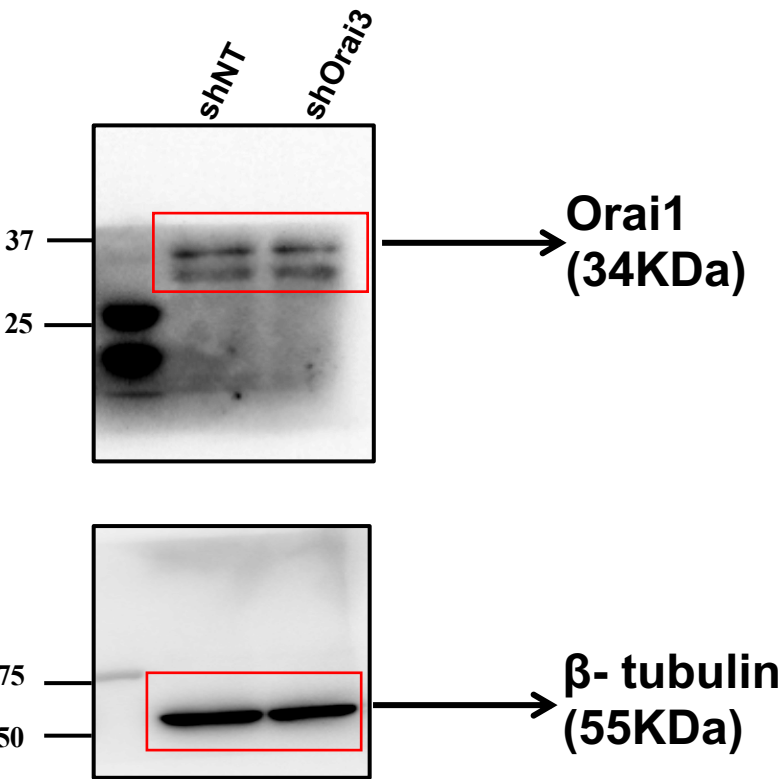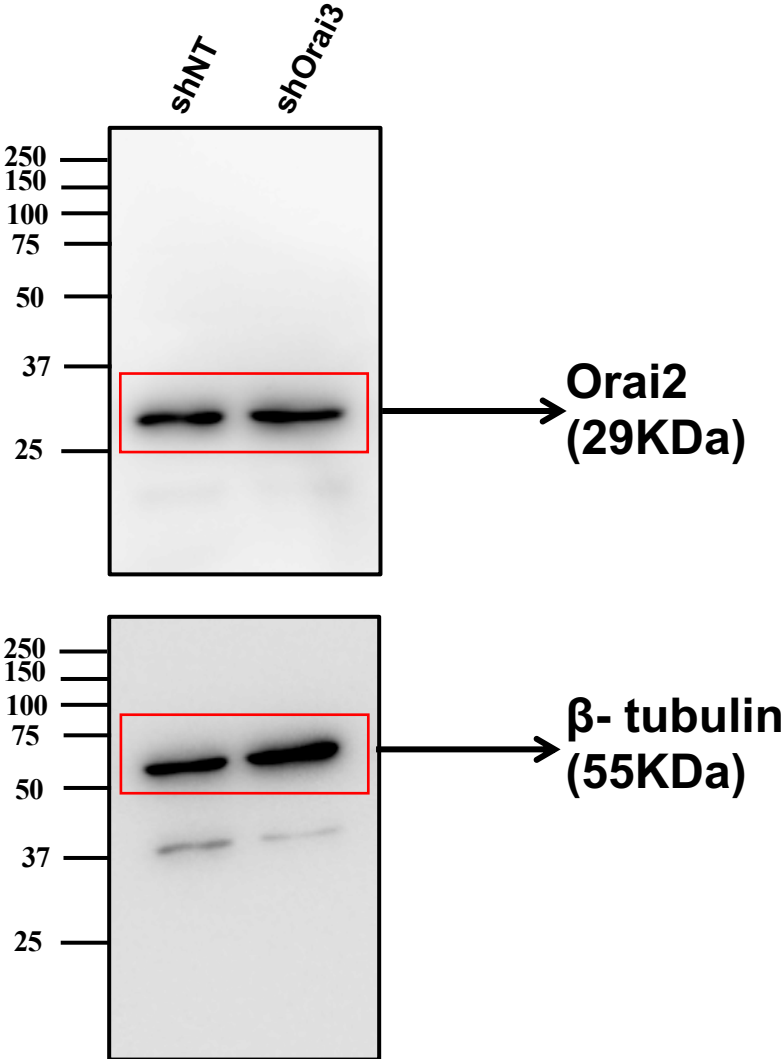

Supplement: s1 [file s1]
